# Supplementary material
Source: Elsevier journal article supplement (https://www.sciencedirect.com/science/article/pii/S0021755718301037)
Supplement: mmc1 [file S0021755718301037:mmc1.docx]

**Supplementary Table 1**. Comparison of HOMA-IR among the individuals positioned within each quartile interval for WHtR, TyG index, and TG/HDL-C.

|  | Girls | | | |  | Boys | | | |
| --- | --- | --- | --- | --- | --- | --- | --- | --- | --- |
|  | 1st | 2nd | 3rd | 4th |  | 1st | 2nd | 3rd | 4th |
| **WHtR** | 2.10 ± 1.13 | 2.08 ± 1.21 | 2.76 ± 1.53 | 4.31 ± 2.44b |  | 1.79 ± 0.89 | 2.09 ± 0.99 | 1.97 ± 1.17 | 3.69 ± 2.69b |
| **TyG index** | 1.99 ± 1.16 | 2.47 ± 1.53 | 2.95 ± 1.78 | 3.85 ± 2.40a |  | 1.45 ± 0.76 | 2.04 ± 0.91 | 2.41 ± 1.22 | 3.95 ± 2.65b |
| **TG/HDL-C** | 2.13 ± 1.17 | 2.28 ± 1.36 | 2.80 ± 1.66 | 3.97 ± 2.42b |  | 1.67 ± 0.92 | 1.85 ± 0.76 | 2.44 ± 1.30 | 4.21 ± 2.86b |

HOMA-IR, homeostatic model assessment for insulin resistance; WHtR, waist-to-height ratio; TyG index, triglycerides/glucose index; TG/HDL-C, triglycerides-to-HDL-C ratio.

a Significantly different from 1st and 2nd quartiles.

b Significantly different from 1st, 2nd, and 3rd quartiles.
